# Supplementary material for: NiTi-Layered Double Hydroxide@Carbon Nanotube as a Cathode Material for Chloride-Ion Batteries
Source: MDPI journal article supplement (doi:10.3390/nano13202779), 2023-10-17
Supplement: s1 [file s1]

## Supporting Information

# NiTi-Layered Double Hydroxide@Carbon Nanotube as a Cathode Material for Chloride-Ion Batteries

Lu Zou <sup>1</sup>, Shijiao Sun <sup>1,\*</sup>, Chang Zhang <sup>1</sup> and Xiangyu Zhao <sup>1,2</sup>

<sup>1</sup> State Key Laboratory of Materials-Oriented Chemical Engineering, College of Materials Science and Engineering, Nanjing Tech University, Nanjing 211816, China; 202061203195@njtech.edu.cn (L.Z.); 202162103016@njtech.edu.cn (C.Z.); xiangyu.zhao@njtech.edu.cn (X.Z.)

<sup>2</sup> Jiangsu Collaborative Innovation Center for Advanced Inorganic Functional Composites, Nanjing Tech University, 30 Puzhu South Road, Nanjing 211816, China

\* Correspondence: sunshijiao@njtech.edu.cn

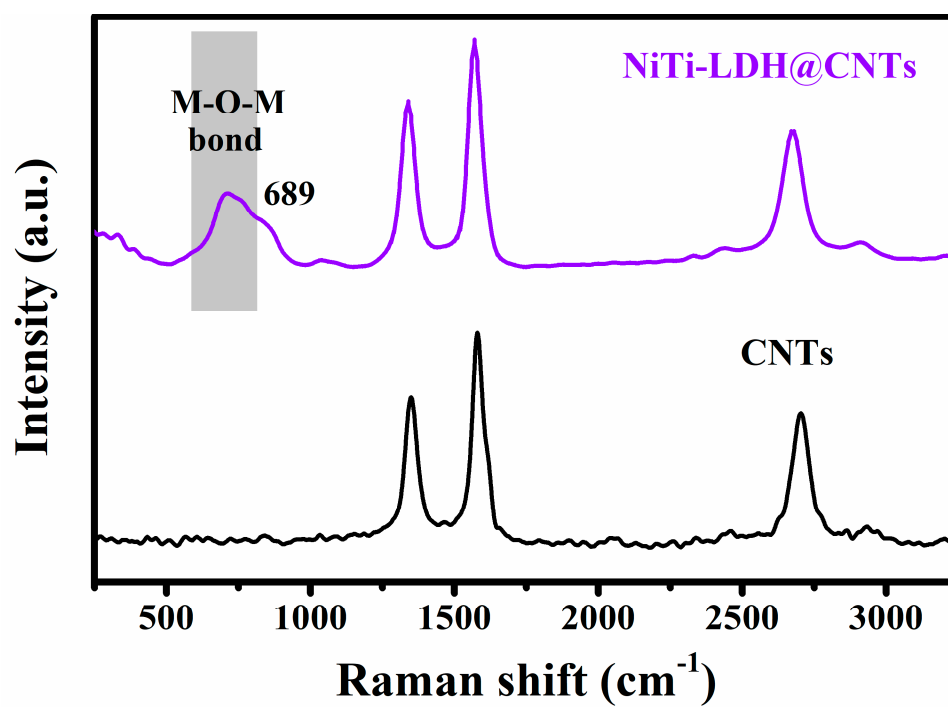

**Figure S1.** Raman spectra of blank CNTs and the as-prepared NiTi-LDH@CNT.

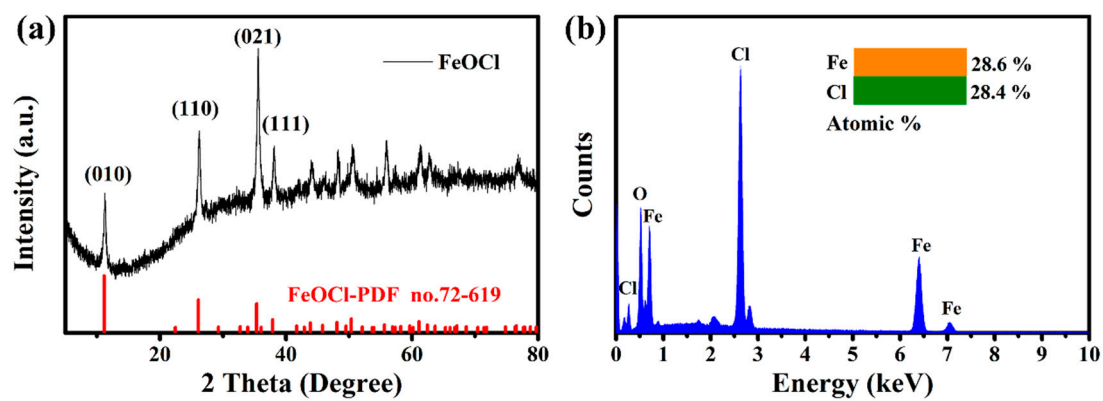

**Figure S2.** (a)XRD patterns and (b)EDS spectra of the of FeOCl

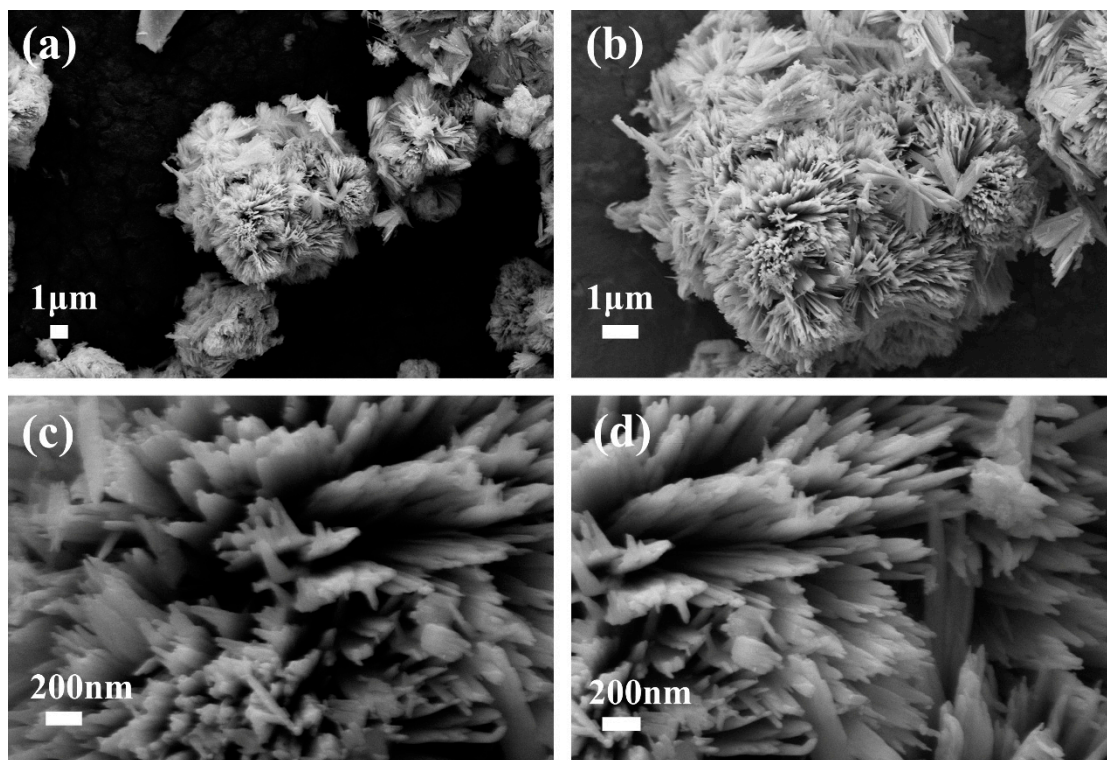

**Figure S3.** Field-emission scanning electron microscopy (FESEM) images of FeOCl prepared by a thermal decomposition method

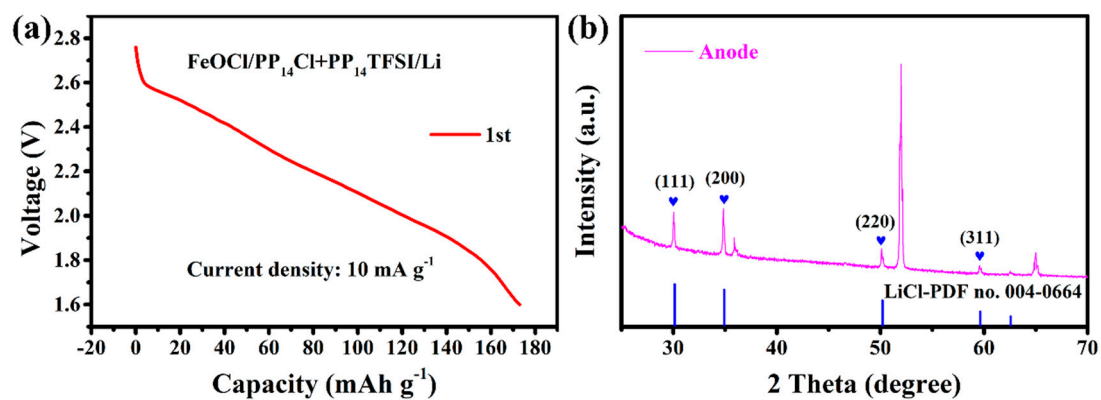

**Figure S4.** (a) Galvanostatic discharge curve of the Li|FeOCl battery; (b) XRD patterns of the as-prepared LiCl anode

**Table S1.** CHNS elemental analysis for NiTi-LDH and NiTi-LDH@CNTs

| Sample        | Element content (wt. %) |      |      |
|---------------|-------------------------|------|------|
|               | C                       | H    | S    |
| NiTi-LDH      | 6.32                    | 3.70 | 1.09 |
| NiTi-LDH@CNTs | 21.25                   | 2.97 | 1.99 |

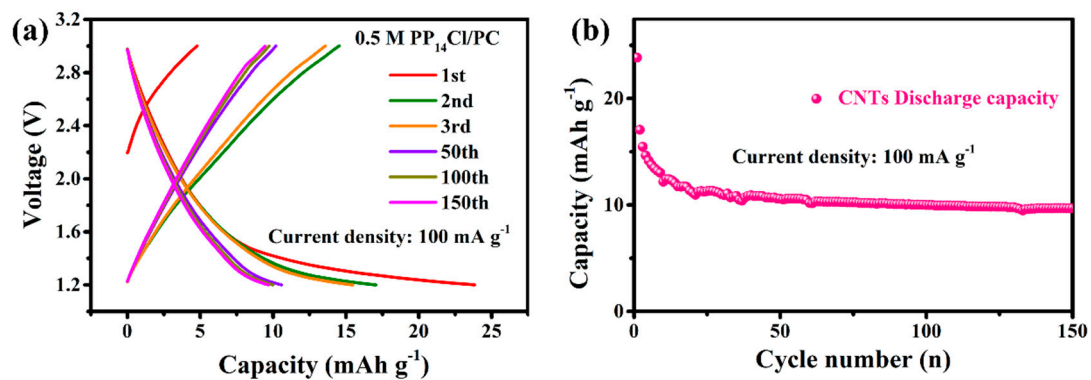

**Figure S5.** (a) The charge and discharge curves of the blank CNTs and (b) the corresponding cycling performance at 100 mA g<sup>-1</sup>
